# Supplementary material for: Selective interactions between diverse STEs organize the ANT-C Hox cluster
Source: PubMed Central journal article supplement (PMC6181975; doi:10.1038/s41598-018-33588-4), 2018-10-11

# Selective interactions between diverse STEs organize the ANT-C Hox cluster.

Mo Li<sup>&</sup>, Zhibo Ma<sup>&</sup>, Sharmila Roy, Sapna K Patel, Derrick C. Lane, Carly R. Duffy and Haini N.

Cai\*

Department of Cellular Biology, University of Georgia, Athens GA 30602

Keywords: insulators, chromatin boundary elements, chromatin loop domains, enhancer-block, enhancer-bypass, homeotic genes, *Drosophila*,

\*: Author to whom correspondence should be addressed.

&: These authors contributed equally to the study.

## Supplemental Information

## Supplemental Tables

**Table S1** Conventional PCR primers used in SF1 3C capture

| Name    | Sequence                      |
|---------|-------------------------------|
| Antp-0i | CTTTCAGGAATCCCGGGAGTT         |
| Antp-0O | CTACAGCCAGGTCATCACTCA         |
| Antp10i | CTGGGGGATACGAGTGTAAGA         |
| Antp10O | CGAGAGAGGGAAAGAGATCCA         |
| Antp11i | CCCAGCTTAAGTGCTTAACCA         |
| Antp11O | CCAAAGCACTACTACCCCTAAG        |
| Antp12i | CAGCAGCAGTGAAAACTTGG          |
| Antp12O | ACTATTGGCGTCATCGTGTTG         |
| Antp13i | CAGCTGTACTCAAGTGGTGAT         |
| Antp13O | CGATCTTGGCTAGATTTGAGATCG      |
| Antp1O  | ACAAACGCACAAGATGGATGG         |
| Antp2i  | TGTTTATAGATTAGCAGAACGTATCTGAG |
| Antp2O  | GTGAAGGAAAACAATTGTACGCA       |
| Antp3i  | GCGATCCATTTATCAACGGCA         |
| Antp3O  | TTATTGTGCCGCTGCAGATT          |
| antp4i  | CCCGCTTATGAAATCGGCATA         |
| Antp4O  | GGCACTAAGAGAAGTTTCCAAGA       |
| Antp5i  | TCATGGCCACGAAAATGTCCA         |
| Antp5O  | GCTCAACTACATCAATGGCCA         |
| Antp6i  | GAATCCTTCGCTTTATTACCATGCA     |

|          |                             |
|----------|-----------------------------|
| Antp6O   | AGGCACAAACAATTTACACACG      |
| Antp7i   | GTGGCATCGTTTTTGGTTGTTG      |
| Antp7O   | CTTCCCCGCTCAATTGATTCT       |
| Antp8i   | TCACAAAAATTACAGGGTGTGGA     |
| Antp8O   | TTATATTTGCAACAGCCAACGGA     |
| Antp9i   | CTAGCACGAAGATAACATCACTATTGA |
| Antp9O   | AAGCAATTGTTGAGTAACGGGT      |
| Dfd-5i   | CTCACGTGTTTCTGACGTACG       |
| Dfd-5O   | AGCAGATGCATCTGCGAAATG       |
| Dfd+5i   | TGCAAAAATGACTTAAGGTAGTAACTT |
| Dfd+5O   | GATTTCCACGGTTCATGCTTT       |
| Dfd+6i   | CGCTCATTGTCAACTAATTAGGACA   |
| Dfd+6O   | AGTTTCTTAACCCACCTACACG      |
| Dfd1-4fR | AGAAACATTACGATCAGGTTTTACA   |
| Dfd1-4rR | ACGTACATATCTGGTTAAGC        |
| Dfd1-Q   | CTTGTTAGCAATTGGAGAGC        |
| Dfd1i    | TGGGCTGTGATCAATCATTGG       |
| Dfd1O    | AGCTAAGACCAGTTTATCGGAC      |
| Dfd2-Q   | CACTTTTCAAATTTCTTCTTACC     |
| Dfd2i    | AAACACTGTGCAATGTGCTGA       |
| Dfd2O    | AGCTTAATACGTCTGACGTACTTC    |
| Dfd3-Q   | CACCTAAATTGGGGTAACTG        |
| Dfd3i    | TTAGAACCAAAAGGAGCTGGG       |

|              |                                |
|--------------|--------------------------------|
| Dfd30        | ATGCGCATATTCCCTTATCGA          |
| Dfd4-Q       | AGTTTGCCGGTAATGTTCT            |
| Dfd4i        | TGATGTAAATATGTATGTATTTCCCTCC   |
| Dfd4O        | CATATGTTCAATTCTGTTGTCCGC       |
| lab-5i       | TAAGCTGGAAAACCTTACCTCACC       |
| lab-5O       | CTGTCTTTCGAATACCCCAAACC        |
| lab-6i       | CAGTGGCGCCTGCATAATAGA          |
| lab-6O       | AAACGGACCCCATGTAATGCC          |
| lab-pb1i     | GGATTTAATTGTAACCTCGAAATCTGGTGA |
| lab-pb1O     | AGATTCAGGGAGTTTACAGTGGA        |
| lab-pb2i     | GACTGTTTTGGTGGAAATTGGCT        |
| lab-pb2O     | GTTTTGGTGGTGCTGCTGCTG          |
| lab-pb3i     | GGATTAGTTTGAGTTCCGATCAGG       |
| lab-pb3O     | TGTCCTTGTTGTCCTCGTCGT          |
| lab-pb4i     | TTTCTCCATTTTCGATCCCGAG         |
| lab-pb4O     | CACACCCAAAGACCATTACCT          |
| lab-pb5i     | GCCAATGATCTGAACGATGCG          |
| lab-pb5O     | TCACGCTCTTTAGAGCCAGAG          |
| lab+4-4F new | GCGGCCGCGAGCGATCACTTTTCGA      |
| lab+4-4R new | GCGGCCGCCGACCAGAAGTGAATTAAATGA |
| Lab+4-5F     | GCGGCCGCTACAACCGAACTTTCACTT    |
| lab+4-5R     | GCGGCCGCACACGTTTCAGTGGGTATAA   |
| lab+4-6F     | GCGGCCGCTTTTTATACCCACTGAACGT   |

|                |                                       |
|----------------|---------------------------------------|
| lab+4-6R       | GCGGCCGCCAATTAGGTGTCATCAATGTCA        |
| lab+5i         | ATTAAGTGTCTTGTCTTGAGCCG               |
| lab+5O         | TAAAAAGGCGAAGGCAGTCTG                 |
| labdown 10i    | ATGCCCGTCTGATGACGACAA                 |
| labdown 10O    | GCTTGCAAGAGTCTGAACGAT                 |
| labdown 11i    | TGATGTCCAAAGCATGTCCTG                 |
| labdown 11O    | ACATAGTACATTCATGTTGCACGT              |
| labdown 12i    | TATTTGAAACAGCTATTACTACAGCTATAGA       |
| labdown 12O    | ATACGGTCAGAACTCTTCCTTCT               |
| labdown 13i    | CGTGGAATTTCTGTCCACCAG                 |
| labdown 13O    | GGAATTGGGCAAATTTAAAAAACCAG            |
| labdown 7i new | GTAAAAGCAAAGCCAGAATGCG                |
| Labdown 7O new | AATCAAACCGATTCCAGGTCG                 |
| labdown 8i     | AAAATCTCTGAATTAGCCAATATTTTATTTTCATTA  |
| labdown 8O     | GCAAGAAATGAAATCGTTATGGGCT             |
| labdown 9i     | TGGGTAAATAAAGGTAATAAGATTACTTTTTAACTAT |
| labdown 9O     | TAAGGGCACTCCCCAAAACT                  |
| labdown1i      | GGAAGATCAGTGTTATTGCGCT                |
| labdown1O      | TTTAAGTGCATGCATGGCCAT                 |
| labdown2i      | TCCTGTGGCACTTTACTAGAACTT              |
| labdown2O      | CGAAAACCAGCTCCTCCTGGT                 |
| labdown3i      | GTGCATACAGGCGATTGAGAA                 |
| labdown3O      | GCCGCAGGATTTTGTATTATGG                |

|           |                                   |
|-----------|-----------------------------------|
| labdown4i | CAGCCGGGCAAACCGTCTATG             |
| labdown4O | GTAACGACATCAAGGCAAAGGT            |
| labdown5i | GATGTTGGCATCGGTGCTCCA             |
| labdown5O | TTGTCAGGGGATCGACTGTCA             |
| labdown6i | GGGAAAGCTTGATGCAACCAT             |
| labdown6O | AAGGCGTTTTGGGGCATAGTT             |
| labdown7i | CAATTGCACAGAAAAAGTTTCGCT          |
| labdown7O | CGGCTTTTACCCGCTTTTCTT             |
| pb-1inew  | CCCCGAACTGTGATAAACGGA             |
| pb-1Onew  | GTGCTCATGGTCAACAAGATG             |
| pb-6i     | TCTTAGAGCATTCTGAATGAAGGA          |
| pb-6O     | TCCTGTGAATATGAGCTTGTTAATGT        |
| pb-Dfd1i  | GCAACATCCTGTAAATAAACAGAAATGTATGAA |
| pb-Dfd1O  | TCAATTCAGTCGAGTCCCGAA             |
| pb-Dfd2i  | AAATCGGGTTTTTCCTTGCCG             |
| pb-Dfd2O  | TTTCGGACCAAACCTCCCCT              |
| pb-Dfd3i  | ACCTACACACTTGGTAGCATAATCA         |
| pb-Dfd3O  | TGTGATCCATTCTGTTCTTGGCT           |
| pb-Dfd4i  | CACGCGAAATGTCCGCTTACA             |
| pb-Dfd4O  | TATTTGAGTATGTAGTCGGCGCA           |
| pb-Dfd5i  | TGACTTCTTGGCAGCAATGCA             |
| pb-Dfd5O  | GTAAGGATTCCGAGCTCGTTG             |
| pb-Dfd6i  | CGCCCTGGATCTGAAGACATA             |

|           |                                           |
|-----------|-------------------------------------------|
| pb-Dfd6O  | CATTATGCACACTTCGCCCGT                     |
| pb-Dfd7i  | GGATTAACATAAACTGAATGCCTGGA                |
| pb-Dfd7O  | GACCACCGTTCAGGACGATAG                     |
| pb-Dfd8i  | AATACATAAAAACACAAGATATTTAAACACCAATTTATAAT |
| pb-Dfd8O  | CGGCCCAAATAAGGAACTACA                     |
| pb+5i     | ATCTGTAGGGTTGGCCGTATT                     |
| pb+5O     | GATACTCAATCCCCATCTCGG                     |
| Scr-1i    | GGCTGCATGCGATATTAACCA                     |
| Scr-1O    | CGCTGGCTGACATCTTTTGAT                     |
| Scr-2i    | GTGCCCGTATCTGACCAACTT                     |
| Scr-2O    | CTCTACAGAAATGATGTATCTCTTCCG               |
| SF1-1i    | CAAATCGATTTTGGGTGTGTCT                    |
| SF1-1O    | ACGAATGACCTATGCCATTTATCT                  |
| SF1loop2R | TCTTCCCTTTAATGTGGCCT                      |
| SF1loop3R | CTGAAATTTGAAAGTATGAA                      |
| SF1loop5  | CCCACACTATGCGTGTGAAC                      |
| SF1loop6  | CCGCAGGACGATAATGAACA                      |
| SF1loop7  | TAATAACCGACAGCTCGGGT                      |
| SF1loop7R | ACCCGAGCTGTCGGTTATTA                      |
| SF1loop8  | TTGCATGTGACGCTAAACGG                      |
| SF1loop8R | CCGTTTAGCGTCACATGCAA                      |
| SF1loop9  | TCTTCCCTTTAATGTGGCCT                      |

**Table S2 PCR primers used for cloning STEs in enhancer-blocking transgenes**

| Name | Sequence                       |
|------|--------------------------------|
| LP2  | GCGGCCGCTTTTTATACCCACTGAACGT   |
|      | GCGGCCGCCAATTAGGTGTCATCAATGTCA |
| DS1  | TGTAAAACCTGATCGTAATGTTTCT      |
|      | GCTTAACCAGATATGTACGT           |
| AU1  | GGAATTCTCAGCTAACGGTAGC         |
|      | CGCTATTTTAAGAAATTAAGCAAATG     |

**Figure S1.**

Figure S1. Relative capture frequency of three STE fragments and the surrounding EcoRI fragments in the *labial (lab)* (A), *Deformed (Dfd)* (B) and *Antp* (C) regions. The dashed line in Panel C represents a distance-capture frequency curve<sup>1</sup>. The p-values were calculated using LSMeans Differences Student's t-test.

**Figure S2.**

*Insulator proteins binding profiles at previously identified STEs.* Screen crops of the ChIP-Chip track of known insulator proteins in 0-12h embryos surrounding the SF1, SF2 and R10 Map coordinate is based on ModEncode GBrowser dm3 (BDGP R5, (<http://www.genome.gov/modENCODE>)). Color shaded bars represent the cloned STE fragments with STE names on top. Yellow-shaded boxes represent called peaks for bound proteins.



Figure S1

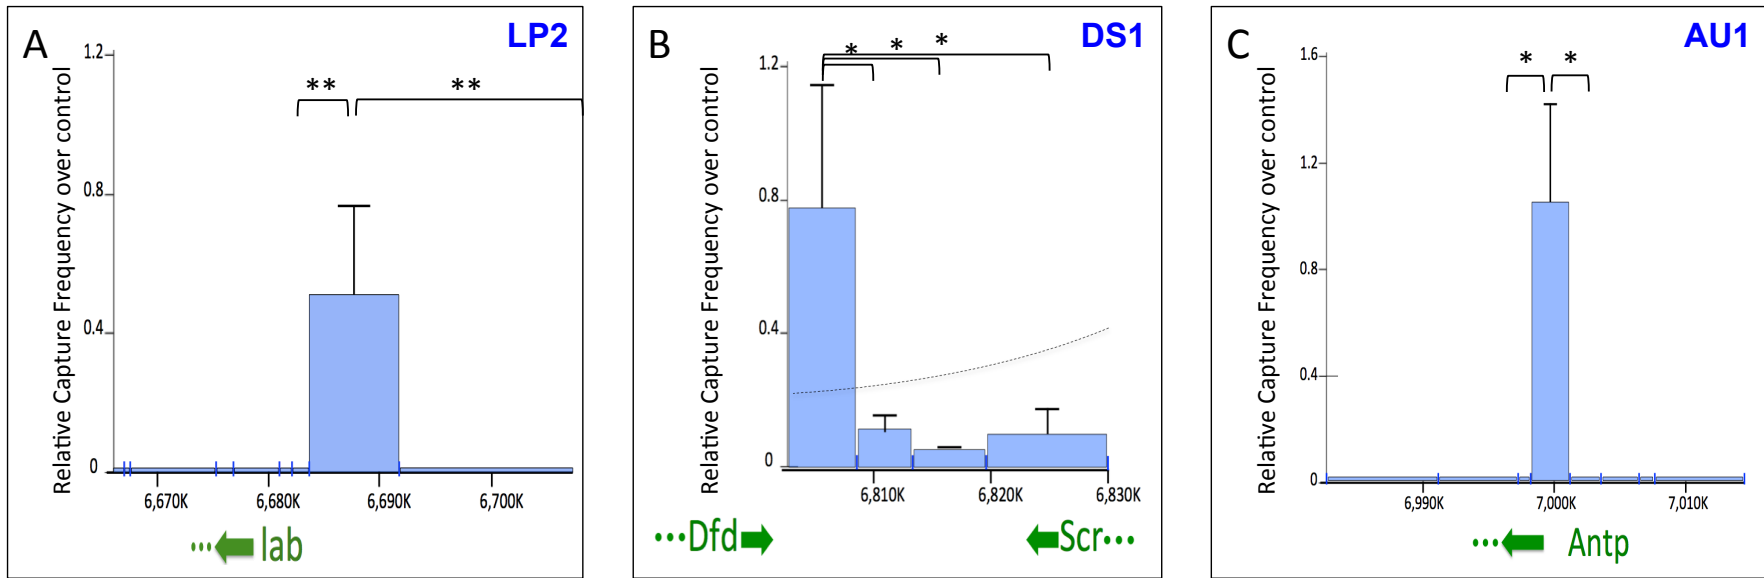

Figure S2

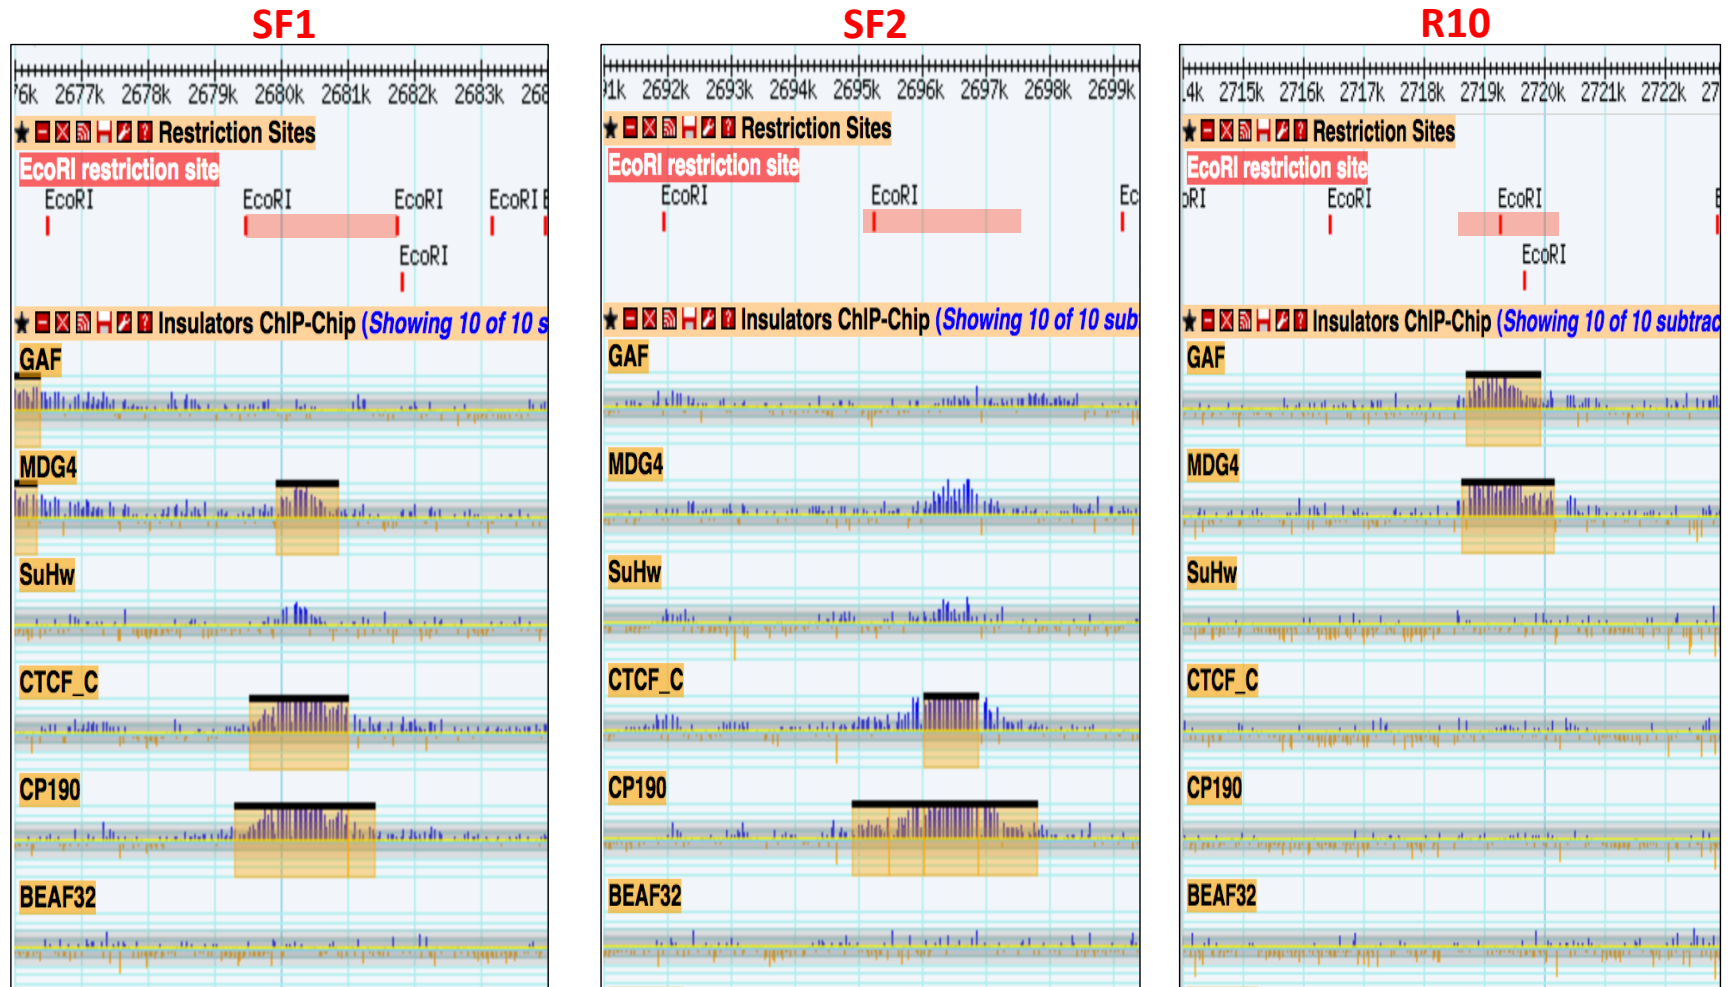

Supplement: 41598_2018_33588_MOESM1_ESM.pdf [file 41598_2018_33588_MOESM1_ESM.pdf]
